# Supplementary material
Source: PubMed Central journal article supplement (PMC5846909)
Supplement: jciinsight-2-94375-s001.pdf [file jciinsight-2-94375-s001.pdf]

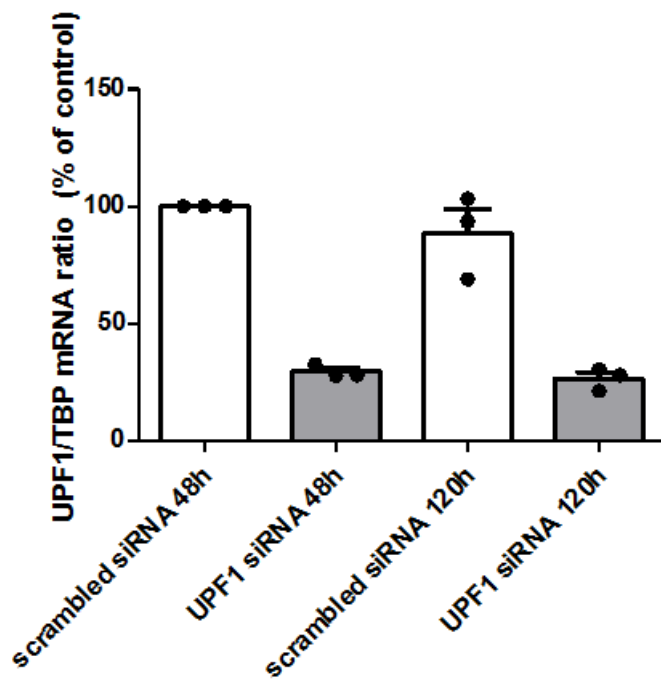

**Supplemental figure 1. qRT-PCR control of RNA interference efficacy of *Upf1* in HK-2 cells 48 h and 120 h after transfection.** Individual data points represent means from independent experiments, plotted with means  $\pm$  SD.

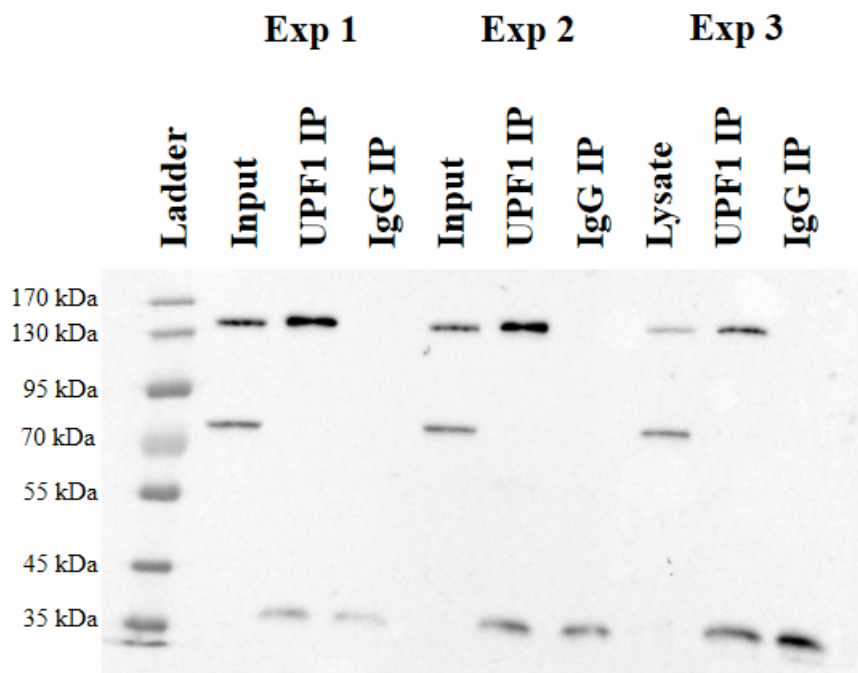

**Supplemental figure 2. Full Western blots for UPF1 of three independent UPF1 RIP experiments.**

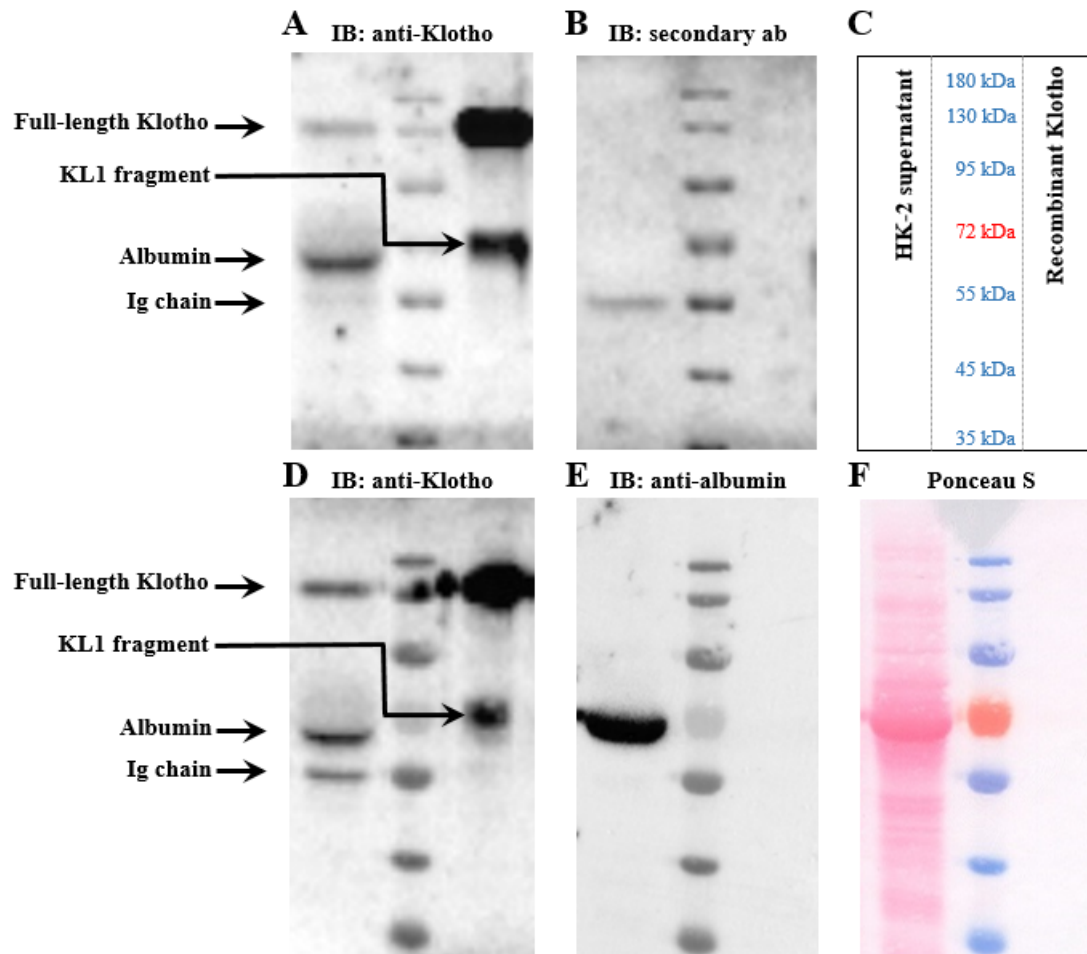

**Supplemental figure 3. Characterization of bands detected on Western blot in HK-2 cell supernatant.** (A) Western blot for Klotho (using KM2076) on HK-2 cell supernatant (48 h conditioning; left lane) and recombinant human Klotho (right lane), showing a pattern similar to Figure 6A. (B) Secondary antibody control for (A), showing that the ~50 kDa band is reactive with polyclonal rabbit anti-rat antibodies, making it likely an immunoglobulin heavy chain. (C) Clarification of samples and ladder protein sizes for all panels. (D) Western blot for Klotho (using KM2076) on HK-2 cell supernatant (72 h conditioning) and recombinant human Klotho, showing a pattern similar to Figure 6A. (E) Re-probing of (D) for albumin, identifying the 65 kDa band in (D) as albumin. (F) Ponceau S protein staining for (D), depicting a prominent band at 65 kDa, identified as residual albumin in (E).

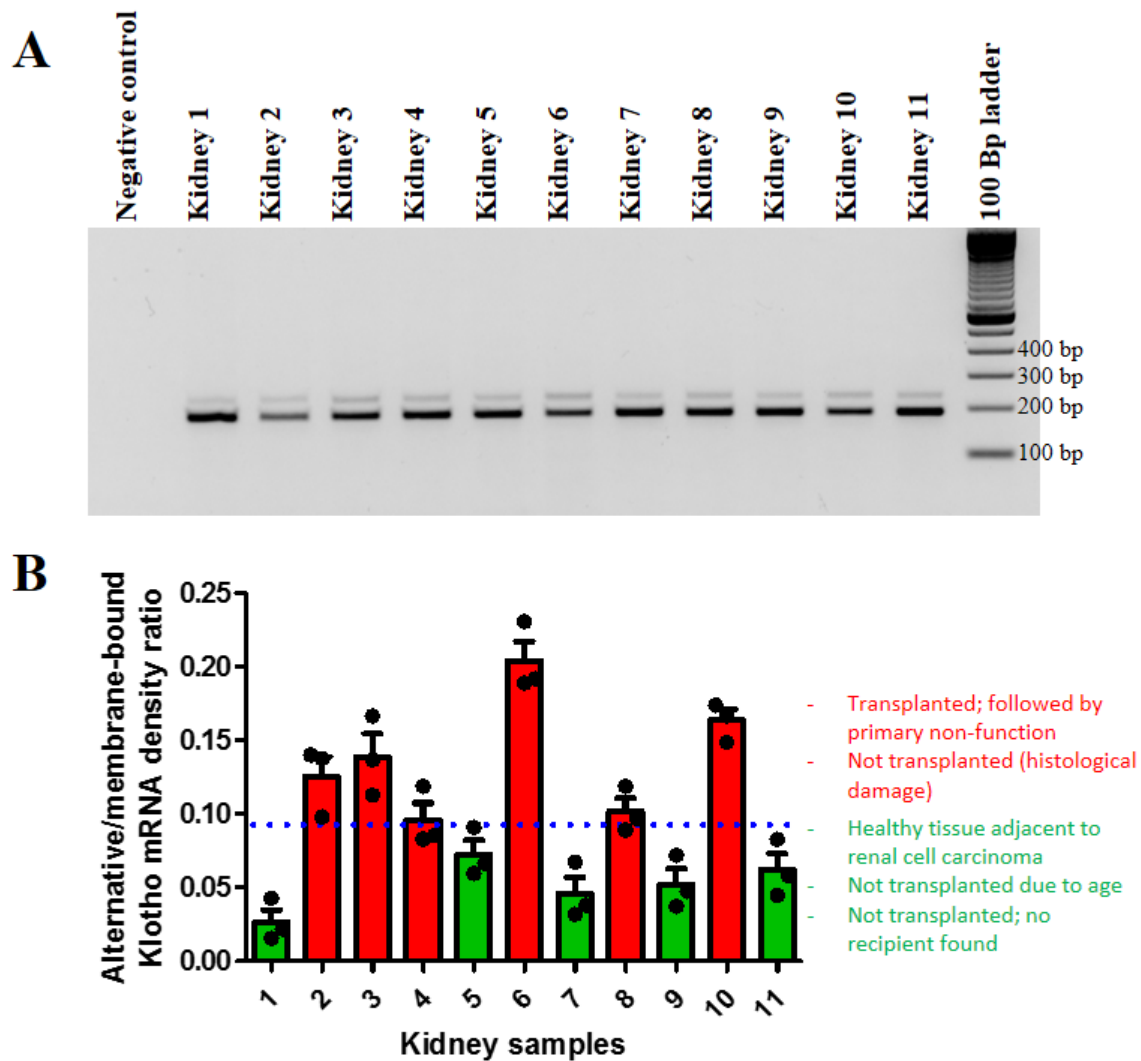

**Supplemental figure 4. Klotho gene splicing is highly variable between different human kidneys and there may be a link between renal damage and dysregulation of Klotho gene splicing.** (A) RT-PCR of the membrane-bound and alternative Klotho mRNA transcripts in random samples of healthy and acute kidney injury human kidney samples. (B) Densitometric quantification of three independent gene expression analyses, plotted as individual data points and depicted with mean  $\pm$  SD. The healthiest kidneys (green bars) appear to be the kidneys with the lowest relative alternative Klotho mRNA expression.

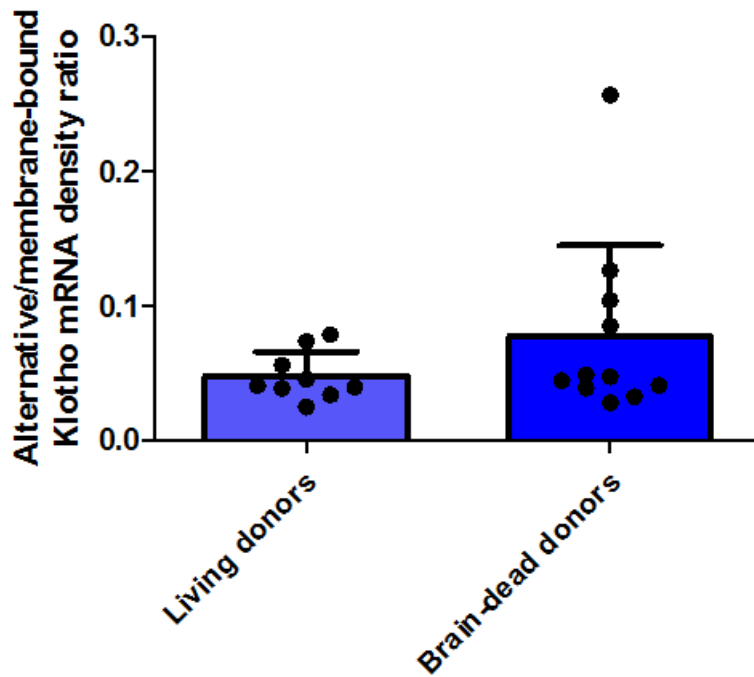

**Supplemental figure 5. Densitometric quantification of RT-PCR analysis for both *Klotho* transcripts on biopsies from living kidney donors (N = 9) and brain-dead kidney donors (N = 10), showing no difference between these groups. Individual data points are plotted with mean  $\pm$  SD.**

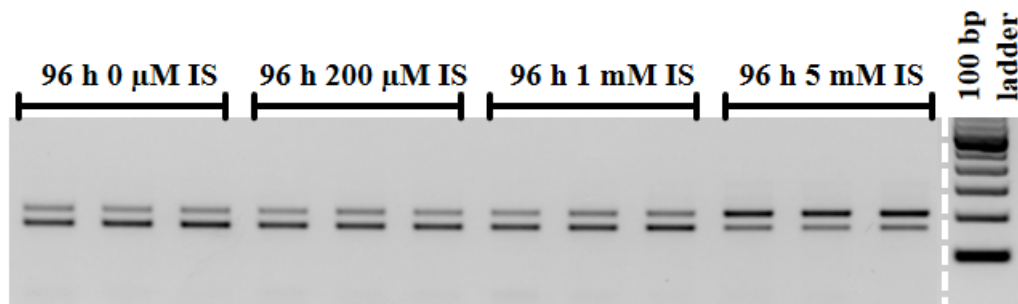

**Supplemental figure 6. Proof of principle that the relative abundance of the *Klotho* gene transcripts can be highly dysregulated *in vitro*.** RT-PCR analysis for both *Klotho* transcripts after stimulation of HK-2 cells with different concentrations of indoxyl sulfate (IS) for 96 h, shows a marked shift towards the alternative *Klotho* mRNA using 5 mM.

Supplemental Table 1. Densitometric values and qPCR data of the example experiments depicted in Figure 2A-C.

|                                                                                    | T = 0 h |      |      | T = 2 h |      |      | T = 4 h |      |      | T = 6 h |      |      |      |
|------------------------------------------------------------------------------------|---------|------|------|---------|------|------|---------|------|------|---------|------|------|------|
| Measurement                                                                        | Sample  | 1    | 2    | 3       | 1    | 2    | 3       | 1    | 2    | 3       | 1    | 2    | 3    |
| <b>Densitometry</b>                                                                |         |      |      |         |      |      |         |      |      |         |      |      |      |
| Alternative <i>Klotho</i> band                                                     |         | 1.00 | 1.13 | 1.03    | 1.01 | 1.12 | 1.08    | 1.55 | 1.53 | 1.58    | 1.71 | 1.90 | 1.76 |
| Membrane-bound <i>Klotho</i> band                                                  |         | 5.94 | 6.08 | 6.87    | 5.50 | 5.48 | 5.00    | 4.46 | 4.74 | 5.29    | 4.22 | 3.81 | 3.63 |
| Ratio                                                                              |         | 0.17 | 0.19 | 0.15    | 0.18 | 0.21 | 0.22    | 0.35 | 0.32 | 0.30    | 0.41 | 0.50 | 0.49 |
| <b>qPCR</b>                                                                        |         |      |      |         |      |      |         |      |      |         |      |      |      |
| $\Delta Ct_{(Ct(\text{alternative } Klotho) - Ct(\text{membrane-bound } Klotho))}$ |         | 0.79 | 0.75 | 0.82    | 0.54 | 0.85 | 0.79    | 0.43 | 0.74 | 0.50    | 0.22 | 0.26 | 0.26 |
| $2^{(-\Delta Ct)}$                                                                 |         | 0.58 | 0.59 | 0.57    | 0.69 | 0.56 | 0.58    | 0.74 | 0.60 | 0.71    | 0.86 | 0.84 | 0.84 |

Supplemental Table 2. Densitometric values and qPCR data of the example experiments depicted in Figure 2D-F.

|                                                                                    | Scrambled 48 h |      |      | Scrambled 120 h |      |      | UPF1 48 h |      |      | UPF1 120 h |      |       |      |
|------------------------------------------------------------------------------------|----------------|------|------|-----------------|------|------|-----------|------|------|------------|------|-------|------|
| Measurement                                                                        | Sample         | 1    | 2    | 3               | 1    | 2    | 3         | 1    | 2    | 3          | 1    | 2     | 3    |
| <b>Densitometry</b>                                                                |                |      |      |                 |      |      |           |      |      |            |      |       |      |
| Alternative <i>Klotho</i> band                                                     |                | 1.00 | 1.06 | 1.03            | 1.12 | 1.18 | 1.15      | 1.15 | 1.19 | 1.13       | 1.59 | 2.20  | 1.65 |
| Membrane-bound <i>Klotho</i> band                                                  |                | 5.39 | 5.11 | 4.89            | 4.65 | 4.82 | 4.98      | 5.39 | 5.60 | 5.11       | 4.80 | 5.82  | 4.76 |
| Ratio                                                                              |                | 0.19 | 0.21 | 0.21            | 0.24 | 0.25 | 0.23      | 0.21 | 0.21 | 0.22       | 0.33 | 0.37  | 0.35 |
| <b>qPCR</b>                                                                        |                |      |      |                 |      |      |           |      |      |            |      |       |      |
| $\Delta Ct_{(Ct(\text{alternative } Klotho) - Ct(\text{membrane-bound } Klotho))}$ |                | 0.45 | 1.15 | 0.75            | 0.53 | 0.48 | 0.84      | 0.80 | 1.09 | 0.96       | 0.78 | -0.28 | 0.53 |
| $2^{(-\Delta Ct)}$                                                                 |                | 0.73 | 0.45 | 0.59            | 0.69 | 0.72 | 0.56      | 0.58 | 0.47 | 0.51       | 0.58 | 1.21  | 0.69 |



## **Supplemental Acknowledgments**

The NIGRAM consortium is a collaboration between the VU University Medical Center (contributing PIs: P.M. ter Wee and M.G. Vervloet, Amsterdam, The Netherlands), the Radboud University Medical Center (contributing PIs: J.G. Hoenderop and R.J. Bindels, Nijmegen, The Netherlands), and the University Medical Center Groningen (contributing PIs: G.J. Navis, M.H. de Borst, and J.L. Hillebrands; Groningen, The Netherlands).
